# Supplementary material for: Two lanthanoid-carboxylate directed coordination polymers for the luminescent selective detection of Fe3+ and meta-nitroaniline in aqueous solution
Source: Royal Society of Chemistry journal article supplement (doi:10.1039/d3nj05433k), 2024-01-01
Supplement: d3nj05433k1.pdf [file d3nj05433k1.pdf]

**Lanthanoid-carboxylates directed two Coordination Polymers for  
the Luminescent Selective Detection of Fe<sup>3+</sup> and meta-nitro  
aniline in Aqueous Solution**

Zaib ul Nisa<sup>a</sup>, Musheer Ahmad<sup>b</sup>, Haq Nawaz Sheikh<sup>a,\*</sup>

<sup>a</sup>Department of Chemistry, University of Jammu, Baba Sahib Ambedkar Road, Jammu 180006,  
India

<sup>b</sup>Department of Applied Chemistry, Faculty of Engineering & Technology, Aligarh Muslim  
University, Aligarh, 202002, India

## Table of Contents

| CONTENTS                                              | Page Number |
|-------------------------------------------------------|-------------|
| 1. X-Ray Crystal structures of MOFs <b>1, 2</b> ..... | S2          |
| 2. Characterization by FTIR, PXRD, TGA and PL.....    | S3-S5       |
| 3. Crystallographic Information (Tables).....         | S6-S7       |
|                                                       |             |
| 1. X-Ray Crystal structures of Ln-CPs <b>1, 2</b>     |             |

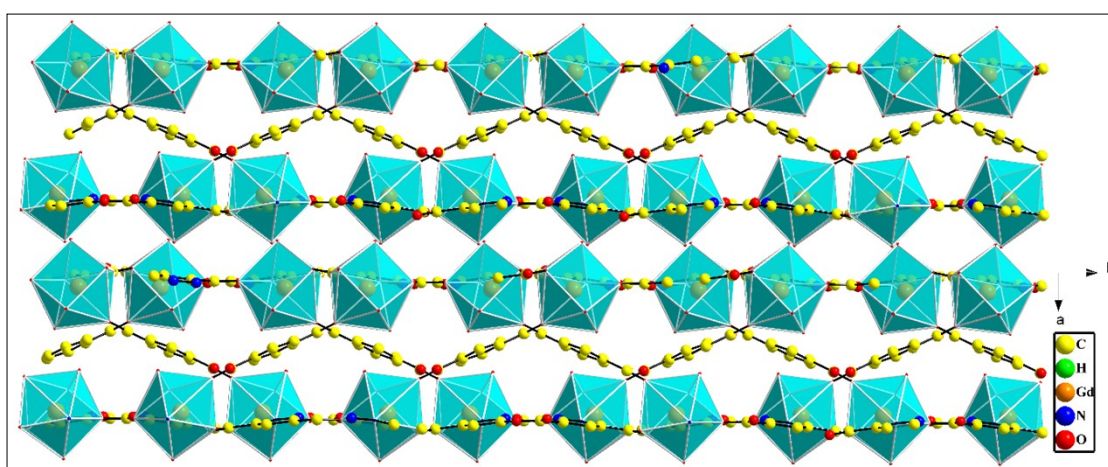

**Fig. S1** Polyhedral view of CP-1 along the c-axis.

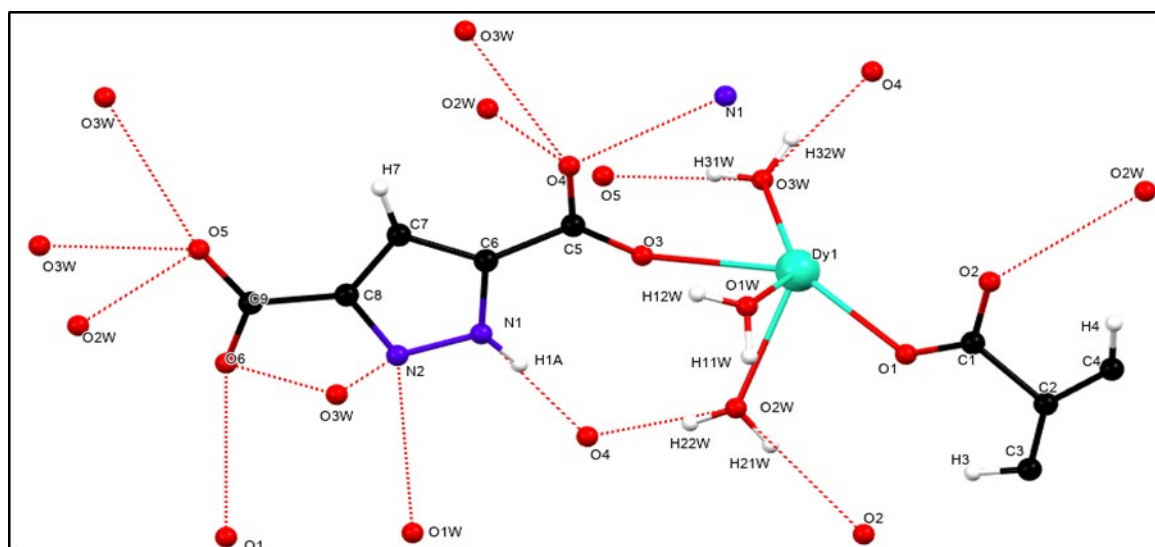

**Fig. S2** Hydrogen bonding positions in Ln CP-1

## 2. Characterization by FTIR, PXRD, TGA and PL

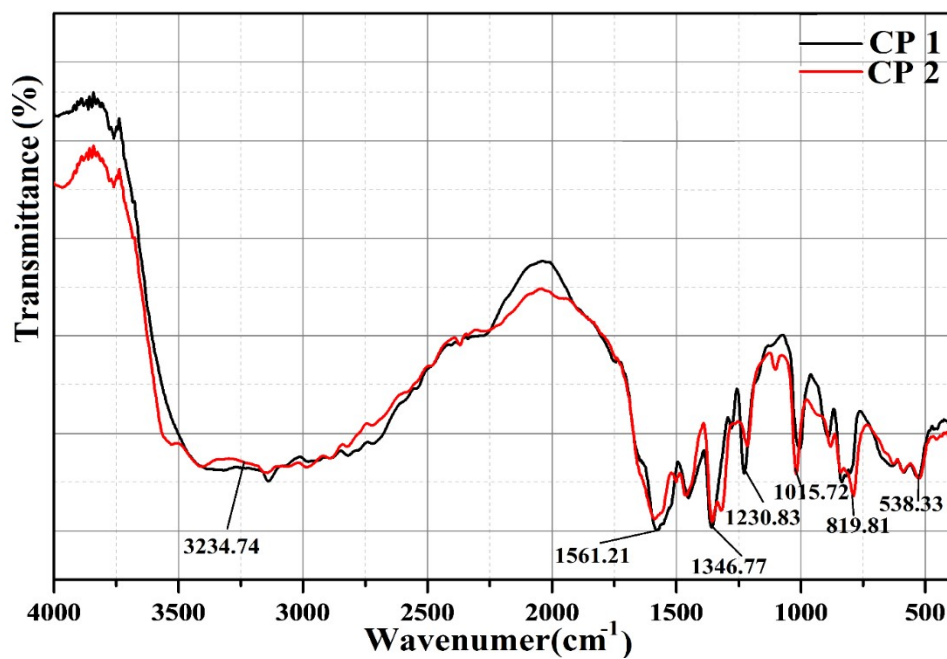

Fig. S3 FTIR spectra of Ln-CPs1 and 2.

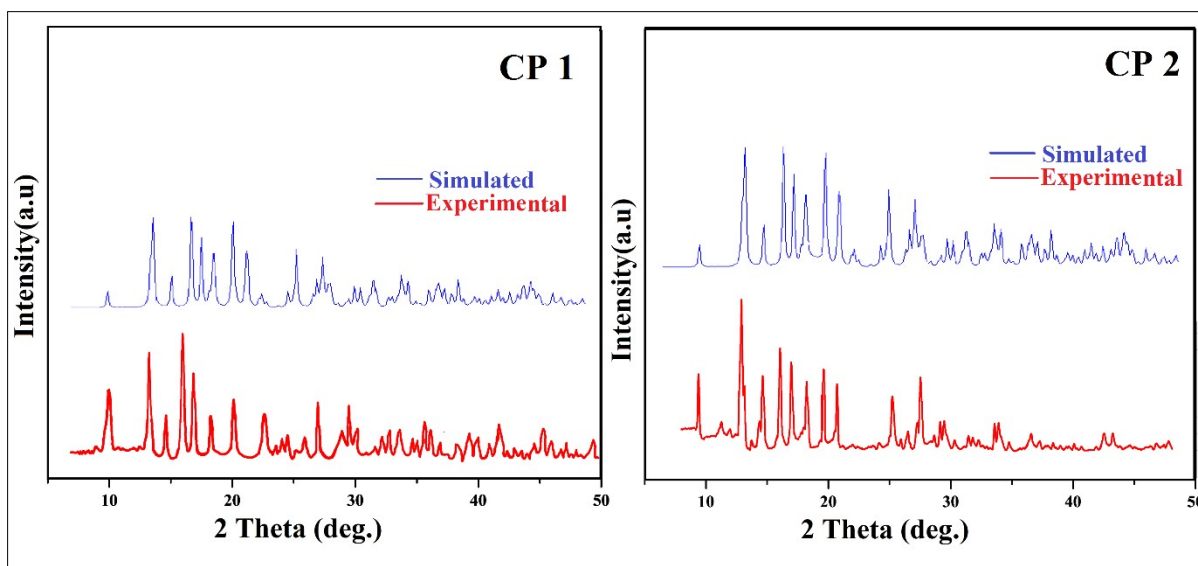

Fig. S4 Experimental and simulated PXRD Patterns of Ln-CP 1 and Ln-CP 2.

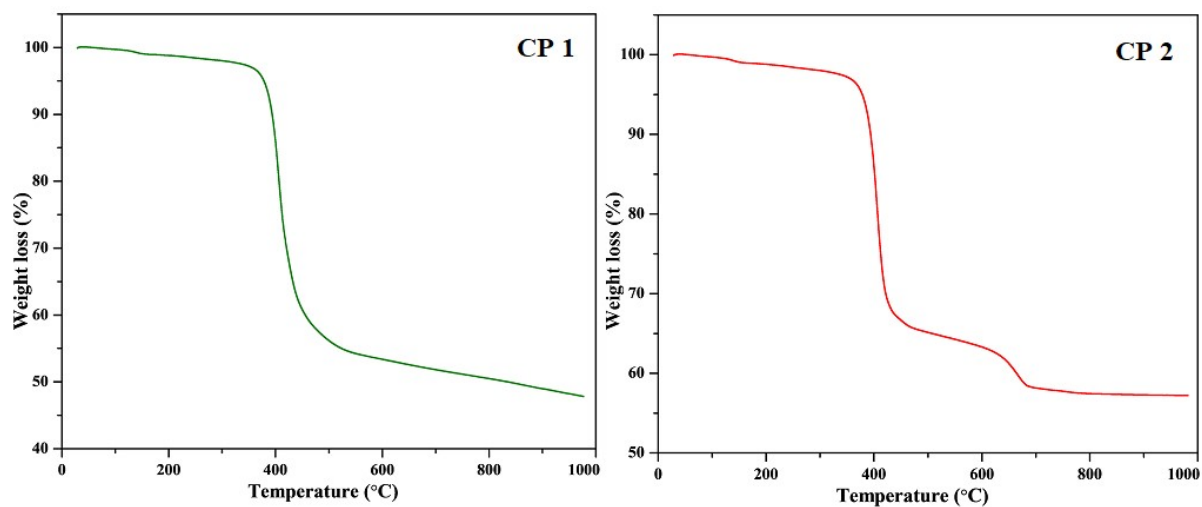

Fig. S5: TGA curves of Ln CPs 1 and 2

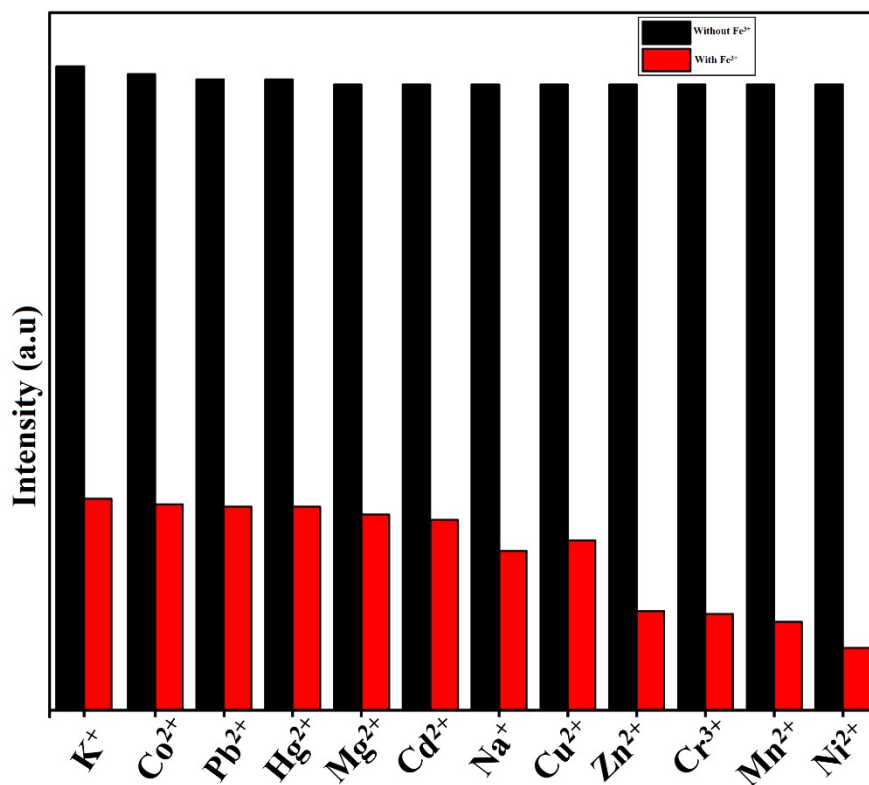

Fig. S6: Changes in luminescence intensity of CP-2 after adding Fe<sup>3+</sup> to different metal ion solutions.

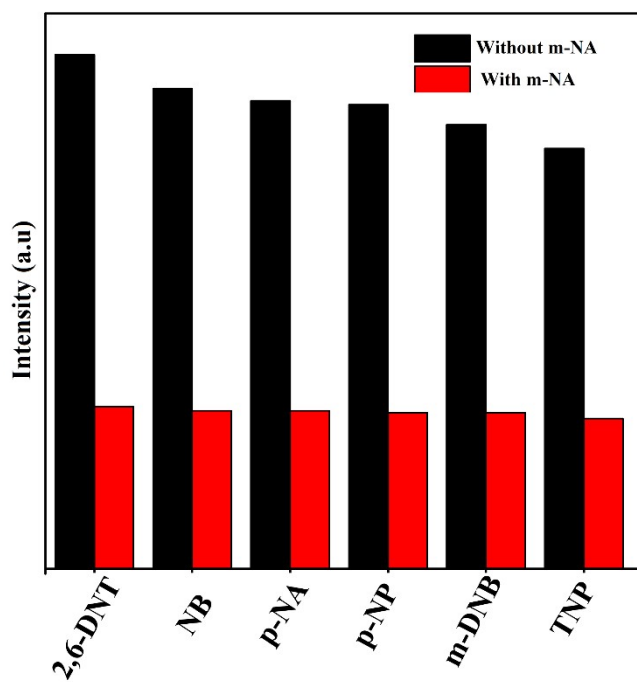

**Fig. S7:** Changes in luminescence intensity of CP 2 after adding m-NA to different nitroaromatic solutions.

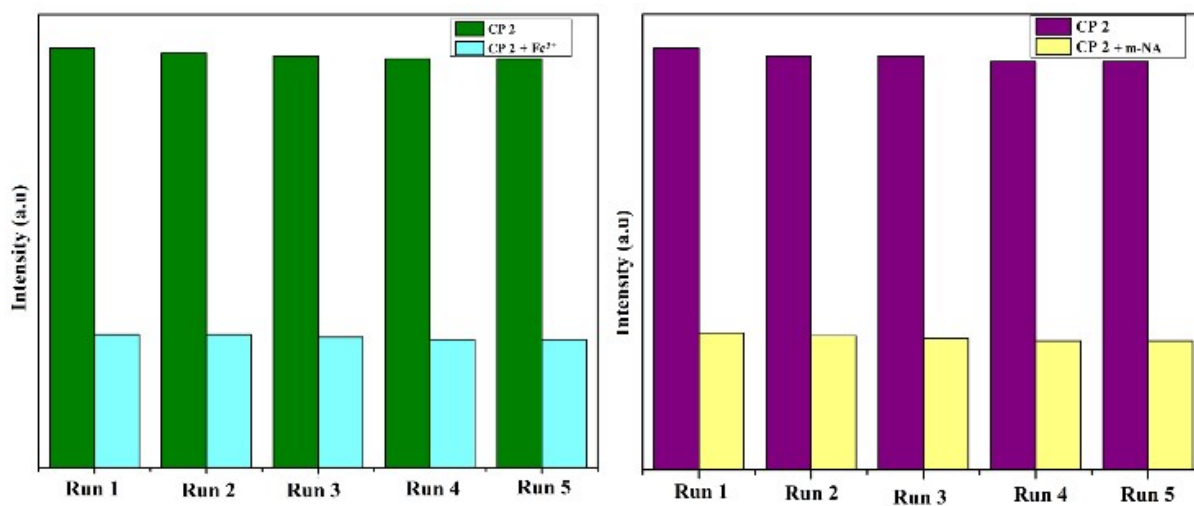

**Fig. S8** Recyclability of CP-2 with Fe<sup>3+</sup> and m-NA after five consecutive cycles

## 3. Crystallographic Information (Tables)

**Table S1.** Selected Bond lengths (Å) for CP 1 (Å)

|                     |           |                      |           |
|---------------------|-----------|----------------------|-----------|
| Gd1—O5              | 2.345 (6) | Gd1—O9               | 2.423 (6) |
| Gd1—O1              | 2.363 (5) | Gd1—O7               | 2.435 (7) |
| Gd1—O8              | 2.363 (6) | Gd1—O3 <sup>ii</sup> | 2.445 (6) |
| Gd1—O4 <sup>i</sup> | 2.410 (6) | Gd1—N2 <sup>ii</sup> | 2.508 (7) |

Symmetry code(s): (i)  $x, y-1, z$ ; (ii)  $x, -y+3/2, z-1/2$ .

**Table S2.** Selected Bond angles (Å) for CP 1

|                         |           |                                        |           |
|-------------------------|-----------|----------------------------------------|-----------|
| O1—Dy1—O3W              | 145.8 (3) | O5 <sup>i</sup> —Dy1—O1W               | 141.8 (3) |
| O1—Dy1—O3               | 140.1 (3) | O1—Dy1—O6 <sup>ii</sup>                | 77.1 (3)  |
| O3W—Dy1—O3              | 72.6 (3)  | O3W—Dy1—O6 <sup>ii</sup>               | 78.0 (3)  |
| O1—Dy1—O2W              | 77.1 (3)  | O3—Dy1—O6 <sup>ii</sup>                | 138.8 (2) |
| O3W—Dy1—O2W             | 114.9 (3) | O2W—Dy1—O6 <sup>ii</sup>               | 147.2 (3) |
| O3—Dy1—O2W              | 73.0 (3)  | O5 <sup>i</sup> —Dy1—O6 <sup>ii</sup>  | 84.2 (2)  |
| O1—Dy1—O5 <sup>i</sup>  | 80.9 (3)  | O1W—Dy1—O6 <sup>ii</sup>               | 115.8 (3) |
| O3W—Dy1—O5 <sup>i</sup> | 73.6 (3)  | O1—Dy1—N2 <sup>ii</sup>                | 110.1 (3) |
| O3—Dy1—O5 <sup>i</sup>  | 113.5 (2) | O3W—Dy1—N2 <sup>ii</sup>               | 79.0 (3)  |
| O2W—Dy1—O5 <sup>i</sup> | 72.1 (3)  | O3—Dy1—N2 <sup>ii</sup>                | 81.9 (3)  |
| O1—Dy1—O1W              | 73.3 (3)  | O2W—Dy1—N2 <sup>ii</sup>               | 145.0 (3) |
| O3W—Dy1—O1W             | 139.6 (3) | O5 <sup>i</sup> —Dy1—N2 <sup>ii</sup>  | 141.9 (3) |
| O3—Dy1—O1W              | 73.8 (3)  | O1W—Dy1—N2 <sup>ii</sup>               | 74.7 (3)  |
| O2W—Dy1—O1W             | 75.0 (3)  | O6 <sup>ii</sup> —Dy1—N2 <sup>ii</sup> | 64.4 (2)  |

Symmetry code(s): (i)  $x, y-1, z$ ; (ii)  $x, -y+3/2, z-1/2$

**Table S3.** Selected Bond lengths (Å) for CP 2

|                     |           |                      |           |
|---------------------|-----------|----------------------|-----------|
| Gd1—O5              | 2.345 (6) | Gd1—O9               | 2.423 (6) |
| Gd1—O1              | 2.363 (5) | Gd1—O7               | 2.435 (7) |
| Gd1—O8              | 2.363 (6) | Gd1—O3 <sup>ii</sup> | 2.445 (6) |
| Gd1—O4 <sup>i</sup> | 2.410 (6) | Gd1—N2 <sup>ii</sup> | 2.508 (7) |

Symmetry code(s): (i)  $x, y-1, z$ ; (ii)  $x, -y+3/2, z-1/2$

**Table S4.** Selected Bond angles (Å) for CP 2

|                         |           |                                        |             |
|-------------------------|-----------|----------------------------------------|-------------|
| O5—Gd1—O1               | 139.3 (2) | O9—Gd1—O7                              | 73.9 (2)    |
| O5—Gd1—O8               | 146.9 (2) | O5—Gd1—O3 <sup>ii</sup>                | 77.2 (2)    |
| O1—Gd1—O8               | 72.8 (2)  | O1—Gd1—O3 <sup>ii</sup>                | 138.47 (19) |
| O5—Gd1—O4 <sup>i</sup>  | 81.6 (2)  | O8—Gd1—O3 <sup>ii</sup>                | 77.7 (2)    |
| O1—Gd1—O4 <sup>i</sup>  | 115.1 (2) | O4 <sup>i</sup> —Gd1—O3 <sup>ii</sup>  | 83.22 (19)  |
| O8—Gd1—O4 <sup>i</sup>  | 74.2 (2)  | O9—Gd1—O3 <sup>ii</sup>                | 147.1 (2)   |
| O5—Gd1—O9               | 77.4 (2)  | O7—Gd1—O3 <sup>ii</sup>                | 117.4 (2)   |
| O1—Gd1—O9               | 73.5 (2)  | O5—Gd1—N2 <sup>ii</sup>                | 109.1 (2)   |
| O8—Gd1—O9               | 115.3 (2) | O1—Gd1—N2 <sup>ii</sup>                | 81.5 (2)    |
| O4 <sup>i</sup> —Gd1—O9 | 72.7 (2)  | O8—Gd1—N2 <sup>ii</sup>                | 78.5 (2)    |
| O5—Gd1—O7               | 72.8 (3)  | O4 <sup>i</sup> —Gd1—N2 <sup>ii</sup>  | 141.3 (2)   |
| O1—Gd1—O7               | 72.2 (2)  | O9—Gd1—N2 <sup>ii</sup>                | 145.2 (2)   |
| O8—Gd1—O7               | 139.0 (2) | O7—Gd1—N2 <sup>ii</sup>                | 75.6 (2)    |
| O4 <sup>i</sup> —Gd1—O7 | 141.4 (2) | O3 <sup>ii</sup> —Gd1—N2 <sup>ii</sup> | 64.3 (2)    |

Symmetry code(s): (i)  $x, y-1, z$ ; (ii)  $x, -y+3/2, z-1/2$ .
